# Supplementary material
Source: publisher figshare collection journal article supplement (https://acs.figshare.com/ndownloader/files/5912295)
Supplement: Supplementary file 1 [file 5912295]

## **Supporting information**

### **Superabsorbent 3D scaffold based on electrospun nanofibers for cartilage tissue engineering**

Weiming Chen <sup>1#</sup>, Shuai Chen <sup>2#</sup>, Yosry Morsi <sup>3</sup>, Hany El-Hamshary <sup>4, 5</sup>, Mohamed El-Newhy <sup>4, 5</sup>,

Cunyi Fan <sup>2\*</sup>, Xiumei Mo <sup>1\*</sup>

<sup>1</sup> State Key Laboratory for Modification of Chemical Fibers and Polymer Materials, College of Chemistry, Chemical Engineering and Biotechnology, Donghua University, Shanghai 201620, China.

<sup>2</sup> Department of Orthopaedics, Shanghai Jiao Tong University Affiliated Sixth People's Hospital, 600 Yishan Road, Shanghai 200233, China

<sup>3</sup> Faculty of Engineering and Industrial Sciences, Swinburne University of Technology, Hawthorn, Vic 3122, Australia

<sup>4</sup> Department of Chemistry, College of Science, King Saud University, Riyadh 11451, Kingdom of Saudi Arabia

<sup>5</sup> Department of Chemistry, Faculty of Science, Tanta University, Tanta 31527, Egypt

Corresponding author Email: xmm@dhu.edu.cn (Xiumei Mo), fancunyi888@163.com (Cunyi Fan)

## 1. 3D scaffolds treated with different temperature

Uncrosslinked scaffolds were heated at 120 °C for 2 h (120 °C 2 h), 160 °C for 2 h (160 °C 2 h), and 190 °C for 2 h (190 °C 2 h) in air, respectively. Then these scaffolds were put in water, the optical photographs of different scaffolds were showed in Figure S1.

## 2. The biodegradability of scaffolds

To characterize the biodegradability property of scaffold in vitro, 50 ~ 60 mg uncrosslinked sample, 3DS-1, and 3DS-2 (n = 3) were separately placed in phosphate buffered solution (PBS, pH = 7.4 ), which were incubated in a thermostatted shaker at 37 °C and the shaking speed was 100 rpm. At the scheduled time (1, 2, 4, 6, and 8 weeks), the percentage of mass remaining was tested from the dry weight before and after degradation.

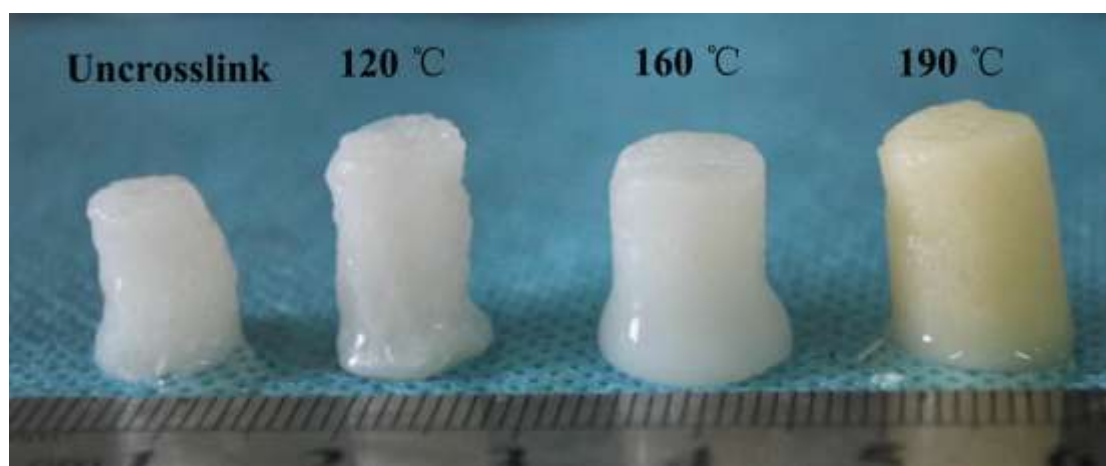

Figure S1. Optical photographs of uncrosslinked scaffold, 120 °C treated scaffold, 160 °C treated scaffold, and 190 °C treated scaffold. All scaffolds were in wet state.

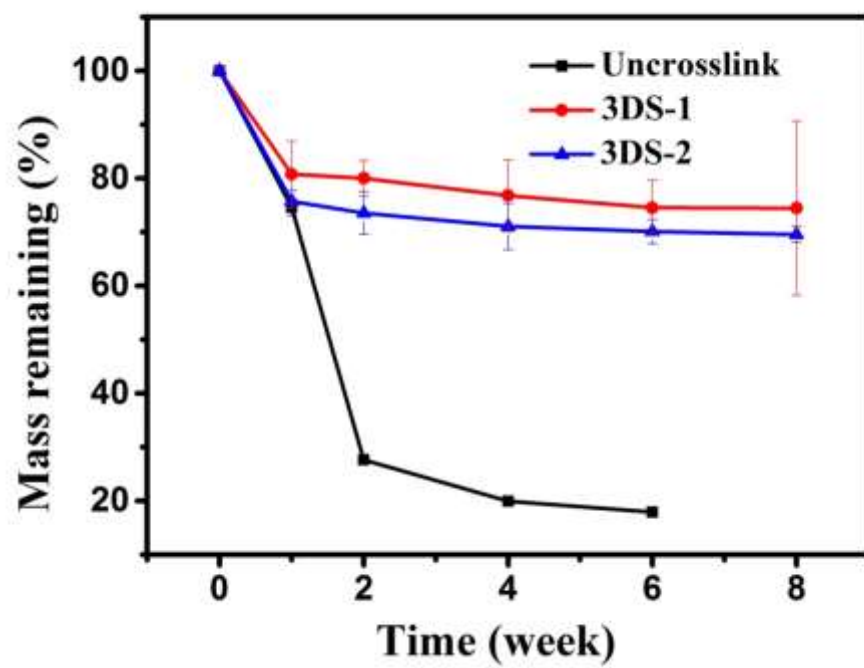

Figure S2. The degradation behavior of uncrosslinked scaffold, 3DS-1 and 3DS-2 in vitro.
